# Supplementary material for: Thermodynamic and Thermal Analyze of N,N-Dimethylformamide + 1-Butanol Mixture Properties Based on Density, Sound Velocity and Heat Capacity Data
Source: MDPI journal article supplement (doi:10.3390/molecules28124698), 2023-06-11
Supplement: s1 [file s1]

**Supplementary Material for**

**Thermodynamic and Thermal Analyze of  
*N,N*-Dimethylformamide + 1-Butanol Mixture  
Properties Based on Density, Sound Velocity and Heat  
Capacity Data**

**Magdalena Tyczyńska \*, Aleksandra Dentkiewicz and Małgorzata Józwiak**

Department of Physical Chemistry, Faculty of Chemistry, University of Lodz, Pomorska  
165, 90-236 Lodz, Poland

\* Correspondence: [magdalena.tyczynska@chemia.uni.lodz.pl](mailto:magdalena.tyczynska@chemia.uni.lodz.pl)

**Table S1.** Experimental values of density,  $\rho$ , of (DMF + BuOH) mixtures at different temperature at pressure  $p = 0.1002 \pm 0.005$  MPa <sup>a</sup>.

| $x_{\text{DMF}}$ | $\rho / \text{kg} \cdot \text{m}^{-3}$ |          |          |          |          |          |
|------------------|----------------------------------------|----------|----------|----------|----------|----------|
|                  | 293.15 K                               | 298.15 K | 303.15 K | 308.15 K | 313.15 K | 318.15 K |
| 0.0000           | 809.55                                 | 805.74   | 801.90   | 798.03   | 794.13   | 790.18   |
| 0.0500           | 815.47                                 | 811.59   | 807.69   | 803.76   | 799.79   | 795.79   |
| 0.1000           | 821.43                                 | 817.49   | 813.52   | 809.53   | 805.51   | 801.46   |
| 0.1500           | 827.50                                 | 823.49   | 819.46   | 815.41   | 811.34   | 807.24   |
| 0.1999           | 833.67                                 | 829.61   | 825.53   | 821.43   | 817.30   | 813.15   |
| 0.2499           | 839.94                                 | 835.84   | 831.71   | 827.55   | 823.38   | 819.19   |
| 0.3000           | 846.34                                 | 842.18   | 838.00   | 833.80   | 829.58   | 825.34   |
| 0.3499           | 852.85                                 | 848.65   | 844.42   | 840.18   | 835.92   | 831.63   |
| 0.4000           | 859.49                                 | 855.25   | 850.97   | 846.68   | 842.37   | 838.04   |
| 0.4500           | 866.25                                 | 861.96   | 857.64   | 853.30   | 848.94   | 844.57   |
| 0.5000           | 873.12                                 | 868.78   | 864.41   | 860.03   | 855.63   | 851.22   |
| 0.5500           | 880.10                                 | 875.72   | 871.31   | 866.88   | 862.45   | 857.99   |
| 0.6000           | 887.21                                 | 882.79   | 878.33   | 873.86   | 869.37   | 864.88   |
| 0.6500           | 894.45                                 | 889.98   | 885.47   | 880.96   | 876.43   | 871.89   |
| 0.7001           | 901.82                                 | 897.29   | 892.75   | 888.19   | 883.63   | 879.05   |
| 0.7500           | 909.31                                 | 904.75   | 900.16   | 895.57   | 890.96   | 886.35   |
| 0.8000           | 916.96                                 | 912.35   | 907.72   | 903.09   | 898.45   | 893.79   |
| 0.8500           | 924.73                                 | 920.07   | 915.41   | 910.74   | 906.05   | 901.36   |
| 0.8999           | 932.64                                 | 927.95   | 923.24   | 918.53   | 913.81   | 909.08   |
| 0.9500           | 940.67                                 | 935.95   | 931.21   | 926.46   | 921.70   | 916.93   |
| 1.0000           | 948.69                                 | 943.92   | 939.14   | 934.36   | 929.56   | 924.76   |

<sup>a</sup> Standard uncertainties  $u$  are  $u(T) = 0.01$  K,  $u(p) = 0.005$  MPa, and the combined expanded uncertainty  $U_c$  is  $U_c(\rho) = 2 \times 10^{-2} \text{ kg} \cdot \text{m}^{-3}$   $U_c(x_{\text{DMF}}) = 5 \times 10^{-5}$  with 0.95 level of confidence ( $k \approx 2$ ).

**Table S2.** Experimental values of sound velocity,  $u$ , for (DMF+BuOH) mixtures at different temperature at pressure  $p = 0.1002 \pm 0.005$  MPa <sup>a</sup>.

| $x_{\text{DMF}}$ | $u/\text{m}\cdot\text{s}^{-1}$ |          |          |          |          |          |
|------------------|--------------------------------|----------|----------|----------|----------|----------|
|                  | 293.15 K                       | 298.15 K | 303.15 K | 308.15 K | 313.15 K | 318.15 K |
| 0.0000           | 1256.4                         | 1239.5   | 1222.7   | 1206.0   | 1189.4   | 1173.2   |
| 0.0500           | 1266.9                         | 1249.7   | 1232.7   | 1215.8   | 1199.1   | 1182.6   |
| 0.1000           | 1277.0                         | 1259.7   | 1242.5   | 1225.5   | 1208.6   | 1191.9   |
| 0.1500           | 1287.0                         | 1269.6   | 1252.2   | 1235.0   | 1218.0   | 1201.3   |
| 0.1999           | 1297.3                         | 1279.7   | 1262.3   | 1244.9   | 1227.7   | 1210.7   |
| 0.2499           | 1307.2                         | 1289.5   | 1271.9   | 1254.5   | 1237.1   | 1220.1   |
| 0.3000           | 1317.4                         | 1299.6   | 1281.9   | 1264.3   | 1246.8   | 1229.6   |
| 0.3499           | 1327.9                         | 1309.9   | 1292.0   | 1274.3   | 1256.7   | 1239.4   |
| 0.4000           | 1338.5                         | 1320.4   | 1302.4   | 1284.5   | 1266.8   | 1249.3   |
| 0.4500           | 1349.4                         | 1331.2   | 1313.1   | 1295.1   | 1277.1   | 1259.4   |
| 0.5000           | 1360.3                         | 1341.8   | 1323.5   | 1305.4   | 1287.4   | 1269.5   |
| 0.5500           | 1370.9                         | 1352.4   | 1334.0   | 1315.7   | 1297.6   | 1279.7   |
| 0.6000           | 1382.1                         | 1363.4   | 1344.9   | 1326.5   | 1308.2   | 1290.2   |
| 0.6500           | 1393.4                         | 1374.6   | 1356.0   | 1337.4   | 1319.0   | 1300.9   |
| 0.7001           | 1405.0                         | 1386.0   | 1367.2   | 1348.6   | 1330.0   | 1311.7   |
| 0.7500           | 1416.8                         | 1397.8   | 1378.8   | 1360.0   | 1341.3   | 1322.8   |
| 0.8000           | 1428.7                         | 1409.5   | 1390.4   | 1371.5   | 1352.7   | 1334.1   |
| 0.8500           | 1440.7                         | 1421.5   | 1402.3   | 1383.2   | 1364.2   | 1345.6   |
| 0.8999           | 1453.0                         | 1433.6   | 1414.3   | 1395.1   | 1376.1   | 1357.3   |
| 0.9500           | 1465.5                         | 1446.0   | 1426.7   | 1407.4   | 1388.1   | 1369.1   |

<sup>a</sup> Standard uncertainties  $u$  are  $u(T) = 0.01$  K,  $u(p) = 0.005$  MPa, and the combined expanded uncertainty  $U_c$  is  $U_c(u) = 0.5 \text{ m}\cdot\text{s}^{-1}$ ,  $U_c(x_{\text{DMF}}) = 5 \times 10^{-5}$  with 0.95 level of confidence ( $k \approx 2$ ).

**Table S3.** Experimental values of specific heat capacity,  $c_p$ , of (DMF + BuOH) mixtures at different temperature at pressure  $p = 0.1002 \pm 0.005$  MPa <sup>a</sup>.

| $x_{\text{DMF}}$ | $c_p / \text{J} \cdot \text{g}^{-1} \cdot \text{K}^{-1}$ |          |          |          |          |          |
|------------------|----------------------------------------------------------|----------|----------|----------|----------|----------|
|                  | 293.15 K                                                 | 298.15 K | 303.15 K | 308.15 K | 313.15 K | 318.15 K |
| 0.0000           | 2.378                                                    | 2.419    | 2.465    | 2.514    | 2.564    | 2.616    |
| 0.0500           | 2.359                                                    | 2.396    | 2.439    | 2.484    | 2.530    | 2.577    |
| 0.1000           | 2.338                                                    | 2.373    | 2.413    | 2.454    | 2.497    | 2.540    |
| 0.1500           | 2.319                                                    | 2.352    | 2.388    | 2.425    | 2.464    | 2.503    |
| 0.1999           | 2.299                                                    | 2.330    | 2.363    | 2.397    | 2.433    | 2.470    |
| 0.2499           | 2.279                                                    | 2.308    | 2.338    | 2.370    | 2.403    | 2.437    |
| 0.3000           | 2.260                                                    | 2.286    | 2.315    | 2.344    | 2.374    | 2.405    |
| 0.3499           | 2.241                                                    | 2.265    | 2.291    | 2.318    | 2.347    | 2.374    |
| 0.4000           | 2.222                                                    | 2.244    | 2.268    | 2.293    | 2.318    | 2.345    |
| 0.4500           | 2.204                                                    | 2.224    | 2.245    | 2.268    | 2.292    | 2.317    |
| 0.5000           | 2.185                                                    | 2.203    | 2.224    | 2.244    | 2.266    | 2.289    |
| 0.5500           | 2.168                                                    | 2.184    | 2.203    | 2.222    | 2.242    | 2.264    |
| 0.6000           | 2.150                                                    | 2.166    | 2.183    | 2.201    | 2.220    | 2.238    |
| 0.6500           | 2.133                                                    | 2.147    | 2.163    | 2.179    | 2.196    | 2.215    |
| 0.7001           | 2.116                                                    | 2.131    | 2.145    | 2.160    | 2.175    | 2.192    |
| 0.7500           | 2.100                                                    | 2.113    | 2.126    | 2.140    | 2.155    | 2.168    |
| 0.8000           | 2.085                                                    | 2.097    | 2.109    | 2.121    | 2.135    | 2.149    |
| 0.8500           | 2.070                                                    | 2.081    | 2.091    | 2.103    | 2.115    | 2.127    |
| 0.8999           | 2.056                                                    | 2.066    | 2.076    | 2.086    | 2.097    | 2.109    |
| 0.9500           | 2.043                                                    | 2.051    | 2.060    | 2.070    | 2.080    | 2.090    |
| 1.0000           | 2.029                                                    | 2.038    | 2.046    | 2.055    | 2.064    | 2.073    |

<sup>a</sup> Standard uncertainties  $u$  are  $u(T) = 0.01$  K,  $u(p) = 0.005$  MPa, and the combined expanded uncertainty  $U_c$  is  $U_c(c_p) = 0.0025 \text{ J} \cdot \text{g}^{-1} \cdot \text{K}^{-1}$ ,  $U_c(x_{\text{DMF}}) = 5 \times 10^{-5}$  with 0.95 level of confidence ( $k \approx 2$ ).

**Table S4.** Partial molar volume of DMF,  $V_{m,DMF}$ , for (DMF + BuOH) mixtures at different temperature at pressure  $p = 0.1002 \pm 0.005$  MPa.

| $x_{DMF}$ | $V_{m,DMF} \times 10^5 / \text{m}^3 \cdot \text{mol}^{-1}$ |          |          |          |          |          |
|-----------|------------------------------------------------------------|----------|----------|----------|----------|----------|
|           | 293.15 K                                                   | 298.15 K | 303.15 K | 308.15 K | 313.15 K | 318.15 K |
| 0.0000    | 7.7060                                                     | 7.7484   | 7.7919   | 7.8357   | 7.8797   | 7.9239   |
| 0.0500    | 7.7054                                                     | 7.7476   | 7.7908   | 7.8343   | 7.8780   | 7.9219   |
| 0.1000    | 7.7055                                                     | 7.7475   | 7.7903   | 7.8335   | 7.8770   | 7.9206   |
| 0.1500    | 7.7055                                                     | 7.7473   | 7.7899   | 7.8327   | 7.8759   | 7.9193   |
| 0.1999    | 7.7055                                                     | 7.7470   | 7.7891   | 7.8317   | 7.8745   | 7.9177   |
| 0.2499    | 7.7055                                                     | 7.7466   | 7.7884   | 7.8306   | 7.8732   | 7.9160   |
| 0.3000    | 7.7053                                                     | 7.7461   | 7.7877   | 7.8295   | 7.8718   | 7.9143   |
| 0.3499    | 7.7051                                                     | 7.7456   | 7.7868   | 7.8283   | 7.8702   | 7.9125   |
| 0.4000    | 7.7047                                                     | 7.7449   | 7.7858   | 7.8271   | 7.8688   | 7.9108   |
| 0.4500    | 7.7043                                                     | 7.7443   | 7.7849   | 7.8259   | 7.8674   | 7.9092   |
| 0.5000    | 7.7040                                                     | 7.7438   | 7.7841   | 7.8249   | 7.8662   | 7.9078   |
| 0.5500    | 7.7038                                                     | 7.7433   | 7.7834   | 7.8240   | 7.8650   | 7.9065   |
| 0.6000    | 7.7036                                                     | 7.7430   | 7.7829   | 7.8233   | 7.8642   | 7.9055   |
| 0.6500    | 7.7034                                                     | 7.7426   | 7.7824   | 7.8227   | 7.8634   | 7.9046   |
| 0.7001    | 7.7032                                                     | 7.7424   | 7.7820   | 7.8221   | 7.8627   | 7.9037   |
| 0.7500    | 7.7031                                                     | 7.7421   | 7.7817   | 7.8216   | 7.8621   | 7.9030   |
| 0.8000    | 7.7028                                                     | 7.7419   | 7.7813   | 7.8212   | 7.8616   | 7.9024   |
| 0.8500    | 7.7029                                                     | 7.7418   | 7.7812   | 7.8210   | 7.8614   | 7.9022   |
| 0.8999    | 7.7029                                                     | 7.7418   | 7.7811   | 7.8210   | 7.8613   | 7.9021   |
| 0.9500    | 7.7031                                                     | 7.7420   | 7.7813   | 7.8212   | 7.8615   | 7.9023   |
| 1.0000    | 7.7048                                                     | 7.7437   | 7.7831   | 7.8230   | 7.8634   | 7.9042   |

$x_{DMF}$  – molar fraction of *N,N*-dimethyloformamide; The uncertainty of the mole fraction  $x_w$  is equal  $\pm 5 \times 10^{-5}$ .

**Table S5.** Partial molar volume of BuOH,  $V_{m,BuOH}$ , for (DMF + BuOH) mixtures at different temperature at pressure  $p = 0.1002 \pm 0.005$  MPa.

| $x_{DMF}$ | $V_{m,BuOH} \times 10^5 / m^3 \cdot mol^{-1}$ |          |          |          |          |          |
|-----------|-----------------------------------------------|----------|----------|----------|----------|----------|
|           | 293.15 K                                      | 298.15 K | 303.15 K | 308.15 K | 313.15 K | 318.15 K |
| 0.0000    | 9.1559                                        | 9.1992   | 9.2432   | 9.2881   | 9.3337   | 9.3803   |
| 0.0500    | 9.1556                                        | 9.1991   | 9.2433   | 9.2882   | 9.3340   | 9.3807   |
| 0.1000    | 9.1560                                        | 9.1997   | 9.2439   | 9.2890   | 9.3349   | 9.3816   |
| 0.1500    | 9.1564                                        | 9.2001   | 9.2446   | 9.2898   | 9.3357   | 9.3825   |
| 0.1999    | 9.1566                                        | 9.2005   | 9.2450   | 9.2902   | 9.3363   | 9.3832   |
| 0.2499    | 9.1569                                        | 9.2008   | 9.2454   | 9.2907   | 9.3368   | 9.3838   |
| 0.3000    | 9.1571                                        | 9.2010   | 9.2457   | 9.2911   | 9.3373   | 9.3844   |
| 0.3499    | 9.1571                                        | 9.2012   | 9.2459   | 9.2914   | 9.3377   | 9.3849   |
| 0.4000    | 9.1570                                        | 9.2012   | 9.2461   | 9.2918   | 9.3382   | 9.3855   |
| 0.4500    | 9.1570                                        | 9.2013   | 9.2463   | 9.2922   | 9.3387   | 9.3862   |
| 0.5000    | 9.1570                                        | 9.2014   | 9.2467   | 9.2927   | 9.3394   | 9.3870   |
| 0.5500    | 9.1570                                        | 9.2016   | 9.2471   | 9.2933   | 9.3402   | 9.3880   |
| 0.6000    | 9.1571                                        | 9.2019   | 9.2477   | 9.2941   | 9.3413   | 9.3892   |
| 0.6500    | 9.1573                                        | 9.2023   | 9.2483   | 9.2950   | 9.3425   | 9.3906   |
| 0.7001    | 9.1573                                        | 9.2027   | 9.2490   | 9.2960   | 9.3436   | 9.3921   |
| 0.7500    | 9.1575                                        | 9.2032   | 9.2498   | 9.2971   | 9.3450   | 9.3936   |
| 0.8000    | 9.1576                                        | 9.2036   | 9.2506   | 9.2982   | 9.3464   | 9.3953   |
| 0.8500    | 9.1579                                        | 9.2042   | 9.2516   | 9.2995   | 9.3481   | 9.3974   |
| 0.8999    | 9.1582                                        | 9.2049   | 9.2526   | 9.3010   | 9.3499   | 9.3995   |
| 0.9500    | 9.1588                                        | 9.2058   | 9.2540   | 9.3027   | 9.3521   | 9.4020   |
| 1.0000    | 9.1608                                        | 9.2082   | 9.2569   | 9.3061   | 9.3559   | 9.4062   |

$x_{DMF}$  – molar fraction of *N,N*-dimethyloformamide; The uncertainty of the mole fraction  $x_w$  is equal  $\pm 5 \times 10^{-5}$ .

**Table S6.** Excess partial molar volume of DMF,  $V_{m,DMF}^E$ , for (DMF + BuOH) mixtures at different temperature at pressure  $p = 0.1002 \pm 0.005$  MPa.

| $x_{DMF}$ | $V_{m,DMF}^E \times 10^8 / \text{m}^3 \cdot \text{mol}^{-1}$ |          |          |          |          |          |
|-----------|--------------------------------------------------------------|----------|----------|----------|----------|----------|
|           | 293.15 K                                                     | 298.15 K | 303.15 K | 308.15 K | 313.15 K | 318.15 K |
| 0.0000    | 1.1370                                                       | 4.6450   | 8.7737   | 12.6707  | 16.3428  | 19.6857  |
| 0.0500    | 0.5812                                                       | 3.8700   | 7.6816   | 11.2658  | 14.6509  | 17.7408  |
| 0.1000    | 0.6986                                                       | 3.7386   | 7.2201   | 10.5102  | 13.6136  | 16.4067  |
| 0.1500    | 0.7072                                                       | 3.5512   | 6.7843   | 9.7607   | 12.5488  | 15.0771  |
| 0.1999    | 0.6915                                                       | 3.2201   | 6.0229   | 8.6864   | 11.1805  | 13.4505  |
| 0.2499    | 0.6481                                                       | 2.8437   | 5.3016   | 7.6363   | 9.8176   | 11.8066  |
| 0.3000    | 0.5131                                                       | 2.3909   | 4.5548   | 6.5358   | 8.4086   | 10.1278  |
| 0.3499    | 0.2579                                                       | 1.8336   | 3.6395   | 5.2745   | 6.8640   | 8.3462   |
| 0.4000    | -0.1231                                                      | 1.1868   | 2.6776   | 4.0999   | 5.4446   | 6.6195   |
| 0.4500    | -0.4864                                                      | 0.5752   | 1.7744   | 2.9519   | 4.0280   | 5.0252   |
| 0.5000    | -0.7838                                                      | 0.0581   | 1.0103   | 1.9247   | 2.8125   | 3.5963   |
| 0.5500    | -1.0260                                                      | -0.4136  | 0.3161   | 1.0293   | 1.6784   | 2.3048   |
| 0.6000    | -1.2408                                                      | -0.7905  | -0.2101  | 0.3156   | 0.8163   | 1.2634   |
| 0.6500    | -1.4166                                                      | -1.1366  | -0.7191  | -0.3299  | 0.0707   | 0.3756   |
| 0.7001    | -1.6586                                                      | -1.3739  | -1.0926  | -0.8723  | -0.6838  | -0.4666  |
| 0.7500    | -1.7536                                                      | -1.5990  | -1.4546  | -1.3508  | -1.2578  | -1.1572  |
| 0.8000    | -1.9895                                                      | -1.8652  | -1.8215  | -1.7919  | -1.7821  | -1.7518  |
| 0.8500    | -1.9570                                                      | -1.9097  | -1.9187  | -1.9450  | -1.9665  | -1.9852  |
| 0.8999    | -1.9639                                                      | -1.9454  | -1.9876  | -2.0355  | -2.0835  | -2.1141  |
| 0.9500    | -1.6920                                                      | -1.7271  | -1.7791  | -1.8286  | -1.8598  | -1.8978  |
| 1.0000    | 0.0000                                                       | 0.0000   | 0.0000   | 0.0000   | 0.0000   | 0.0000   |

$x_{DMF}$  – molar fraction of *N,N*-dimethyloformamide; The uncertainty of the mole fraction  $x_w$  is equal  $\pm 5 \times 10^{-5}$ .

**Table S7.** Excess partial molar volume of BuOH,  $V_{m,\text{BuOH}}^E$ , for (DMF + BuOH) mixtures at different temperature at pressure  $p = 0.1002 \pm 0.005$  MPa.

| $x_{\text{DMF}}$ | $V_{m,\text{BuOH}}^E \times 10^8 / \text{m}^3 \cdot \text{mol}^{-1}$ |          |          |          |          |          |
|------------------|----------------------------------------------------------------------|----------|----------|----------|----------|----------|
|                  | 293.15 K                                                             | 298.15 K | 303.15 K | 308.15 K | 313.15 K | 318.15 K |
| 0.0000           | 0.0000                                                               | 0.0000   | 0.0000   | 0.0000   | 0.0000   | 0.0000   |
| 0.0500           | -0.2535                                                              | -0.0940  | 0.0279   | 0.1291   | 0.2320   | 0.3330   |
| 0.1000           | 0.1661                                                               | 0.4555   | 0.6864   | 0.9076   | 1.1186   | 1.2767   |
| 0.1500           | 0.4769                                                               | 0.9490   | 1.3707   | 1.6921   | 1.9778   | 2.2249   |
| 0.1999           | 0.7634                                                               | 1.2988   | 1.7294   | 2.1519   | 2.5334   | 2.8761   |
| 0.2499           | 1.0222                                                               | 1.6034   | 2.1280   | 2.6358   | 3.0945   | 3.5100   |
| 0.3000           | 1.1894                                                               | 1.8316   | 2.5013   | 3.0694   | 3.6094   | 4.1091   |
| 0.3499           | 1.2365                                                               | 1.9551   | 2.7061   | 3.3421   | 3.9887   | 4.6053   |
| 0.4000           | 1.1578                                                               | 1.9893   | 2.8641   | 3.7015   | 4.4933   | 5.1564   |
| 0.4500           | 1.0966                                                               | 2.0586   | 3.0810   | 4.0875   | 5.0006   | 5.8400   |
| 0.5000           | 1.1015                                                               | 2.2224   | 3.4370   | 4.5944   | 5.7091   | 6.6889   |
| 0.5500           | 1.1615                                                               | 2.4317   | 3.8628   | 5.2331   | 6.4989   | 7.6752   |
| 0.6000           | 1.2489                                                               | 2.7358   | 4.4566   | 6.0533   | 7.5608   | 8.9117   |
| 0.6500           | 1.3754                                                               | 3.0706   | 5.0676   | 6.9419   | 8.7391   | 10.3017  |
| 0.7001           | 1.4356                                                               | 3.5142   | 5.8142   | 7.9336   | 9.9085   | 11.7373  |
| 0.7500           | 1.6429                                                               | 3.9701   | 6.5722   | 8.9891   | 11.2584  | 13.3245  |
| 0.8000           | 1.7091                                                               | 4.3848   | 7.3254   | 10.0820  | 12.6581  | 15.0077  |
| 0.8500           | 2.0438                                                               | 5.0212   | 8.3482   | 11.4629  | 14.3976  | 17.0522  |
| 0.8999           | 2.3392                                                               | 5.6664   | 9.3993   | 12.9065  | 16.2046  | 19.2011  |
| 0.9500           | 2.9133                                                               | 6.5657   | 10.7278  | 14.6474  | 18.3522  | 21.6952  |
| 1.0000           | 4.9075                                                               | 8.9737   | 13.6270  | 18.0100  | 22.1360  | 25.8708  |

$x_{\text{DMF}}$  – molar fraction of *N,N*-dimethyloformamide; The uncertainty of the mole fraction  $x_w$  is equal  $\pm 5 \times 10^{-5}$ .



**Table S8.** The values of isentropic ( $\kappa_s$ ) and isothermal ( $\kappa_T$ ) compressibility coefficients for (DMF + BuOH) mixtures at different temperature at pressure  $p = 0.1002 \pm 0.005$  MPa.

| $x_{\text{DMF}}$ | (Pa <sup>-1</sup> )       |                           |                           |                           |                           |                           |                           |                           |                           |                           |                           |                           |
|------------------|---------------------------|---------------------------|---------------------------|---------------------------|---------------------------|---------------------------|---------------------------|---------------------------|---------------------------|---------------------------|---------------------------|---------------------------|
|                  | 293.15 K                  |                           | 298.15 K                  |                           | 303.15 K                  |                           | 308.15 K                  |                           | 313.15 K                  |                           | 318.15 K                  |                           |
|                  | $\kappa_s \times 10^{10}$ | $\kappa_T \times 10^{10}$ |
| 0.0000           | 7.8249                    | 9.1582                    | 8.0784                    | 9.4562                    | 8.3417                    | 9.7617                    | 8.6156                    | 10.0762                   | 8.9007                    | 10.0762                   | 9.1945                    | 10.7347                   |
| 0.0500           | 7.6408                    | 9.0043                    | 7.8895                    | 9.2977                    | 8.1479                    | 9.5986                    | 8.4167                    | 9.9087                    | 8.6966                    | 9.9087                    | 8.9856                    | 10.5589                   |
| 0.1000           | 7.4648                    | 8.8565                    | 7.7085                    | 9.1452                    | 7.9620                    | 9.4410                    | 8.2255                    | 9.7462                    | 8.4996                    | 9.7462                    | 8.7828                    | 10.3857                   |
| 0.1500           | 7.2957                    | 8.7174                    | 7.5342                    | 8.9993                    | 7.7824                    | 9.2889                    | 8.0405                    | 9.5883                    | 8.3088                    | 9.5883                    | 8.5847                    | 10.2136                   |
| 0.1999           | 7.1271                    | 8.5649                    | 7.3601                    | 8.8432                    | 7.6026                    | 9.1295                    | 7.8550                    | 9.4257                    | 8.1178                    | 9.4257                    | 8.3903                    | 10.0466                   |
| 0.2499           | 6.9669                    | 8.4213                    | 7.1948                    | 8.6954                    | 7.4320                    | 8.9782                    | 7.6787                    | 9.2695                    | 7.9354                    | 9.2695                    | 8.2009                    | 9.8801                    |
| 0.3000           | 6.8076                    | 8.2775                    | 7.0303                    | 8.5469                    | 7.2622                    | 8.8248                    | 7.5033                    | 9.1113                    | 7.7542                    | 9.1113                    | 8.0138                    | 9.7121                    |
| 0.3499           | 6.6500                    | 8.1302                    | 6.8676                    | 8.3960                    | 7.0942                    | 8.6704                    | 7.3295                    | 8.9528                    | 7.5748                    | 8.9528                    | 7.8284                    | 9.5460                    |
| 0.4000           | 6.4943                    | 7.9884                    | 6.7067                    | 8.2496                    | 6.9279                    | 8.5188                    | 7.1579                    | 8.7962                    | 7.3978                    | 8.7962                    | 7.6459                    | 9.3797                    |
| 0.4500           | 6.3397                    | 7.8434                    | 6.5469                    | 8.1007                    | 6.7629                    | 8.3661                    | 6.9875                    | 8.6399                    | 7.2219                    | 8.6399                    | 7.4654                    | 9.2154                    |
| 0.5000           | 6.1900                    | 7.7032                    | 6.3933                    | 7.9573                    | 6.6045                    | 8.2184                    | 6.8235                    | 8.4877                    | 7.0521                    | 8.4877                    | 7.2896                    | 9.0531                    |
| 0.5500           | 6.0462                    | 7.5661                    | 6.2437                    | 7.8154                    | 6.4495                    | 8.0718                    | 6.6639                    | 8.3374                    | 6.8865                    | 8.3374                    | 7.1168                    | 8.8915                    |
| 0.6000           | 5.9009                    | 7.4306                    | 6.0938                    | 7.6747                    | 6.2946                    | 7.9260                    | 6.5037                    | 8.1861                    | 6.7212                    | 8.1861                    | 6.9462                    | 8.7305                    |
| 0.6500           | 5.7582                    | 7.2933                    | 5.9465                    | 7.5336                    | 6.1424                    | 7.7813                    | 6.3462                    | 8.0374                    | 6.5585                    | 8.0374                    | 6.7776                    | 8.5719                    |
| 0.7001           | 5.6175                    | 7.1622                    | 5.8012                    | 7.3951                    | 5.9922                    | 7.6361                    | 6.1909                    | 7.8848                    | 6.3976                    | 7.8848                    | 6.6116                    | 8.4053                    |
| 0.7500           | 5.4784                    | 7.0240                    | 5.6573                    | 7.2530                    | 5.8435                    | 7.4897                    | 6.0372                    | 7.7341                    | 6.2390                    | 7.7341                    | 6.4476                    | 8.2464                    |
| 0.8000           | 5.3428                    | 6.8909                    | 5.5169                    | 7.1146                    | 5.6983                    | 7.3464                    | 5.8869                    | 7.5862                    | 6.0830                    | 7.5862                    | 6.2858                    | 8.0851                    |
| 0.8500           | 5.2097                    | 6.7574                    | 5.3792                    | 6.9769                    | 5.5556                    | 7.2048                    | 5.7391                    | 7.4383                    | 5.9303                    | 7.4383                    | 6.1277                    | 7.9292                    |
| 0.8999           | 5.0789                    | 6.6230                    | 5.2436                    | 6.8382                    | 5.4150                    | 7.0607                    | 5.5936                    | 7.2906                    | 5.7793                    | 7.2906                    | 5.9714                    | 7.7715                    |
| 0.9500           | 4.9498                    | 6.4868                    | 5.1097                    | 6.6984                    | 5.2761                    | 6.9175                    | 5.4494                    | 7.1427                    | 5.6308                    | 7.1427                    | 5.8184                    | 7.6170                    |
| 1.0000           | 4.8322                    | 6.3655                    | 4.9878                    | 6.5721                    | 5.1497                    | 6.7858                    | 5.3182                    | 7.0063                    | 5.4938                    | 7.0063                    | 5.6749                    | 7.4684                    |

$x_{\text{DMF}}$  – molar fraction of *N,N*-dimethyloformamide; The uncertainty of the mole fraction  $x_w$  is equal  $\pm 5 \times 10^{-5}$ .

**Table S9.** Isobaric ( $C_{p,m}$ ) and isochoric ( $C_{V,m}$ ) molar heat capacity of (DMF + BuOH) mixtures at different temperature at pressure  $p = 0.1002 \pm 0.005$  MPa.

| $x_{\text{DMF}}$ | (J·mol <sup>-1</sup> ·K <sup>-1</sup> ) |           |           |           |           |           |           |           |           |           |           |           |
|------------------|-----------------------------------------|-----------|-----------|-----------|-----------|-----------|-----------|-----------|-----------|-----------|-----------|-----------|
|                  | 293.15 K                                |           | 298.15 K  |           | 303.15 K  |           | 308.15 K  |           | 313.15 K  |           | 318.15 K  |           |
|                  | $C_{p,m}$                               | $C_{V,m}$ | $C_{p,m}$ | $C_{V,m}$ | $C_{p,m}$ | $C_{V,m}$ | $C_{p,m}$ | $C_{V,m}$ | $C_{p,m}$ | $C_{V,m}$ | $C_{p,m}$ | $C_{V,m}$ |
| 0.0000           | 176.27                                  | 150.61    | 179.30    | 153.17    | 182.68    | 156.11    | 186.32    | 159.31    | 190.08    | 162.66    | 193.88    | 166.06    |
| 0.0500           | 174.70                                  | 148.24    | 177.50    | 150.62    | 180.64    | 153.33    | 183.96    | 156.26    | 187.42    | 159.35    | 190.85    | 162.41    |
| 0.1000           | 173.06                                  | 145.87    | 175.63    | 148.04    | 178.59    | 150.62    | 181.66    | 153.32    | 184.85    | 156.16    | 188.01    | 158.99    |
| 0.1500           | 171.50                                  | 143.53    | 173.94    | 145.62    | 176.65    | 148.00    | 179.40    | 150.44    | 182.23    | 152.98    | 185.16    | 155.63    |
| 0.1999           | 169.93                                  | 141.40    | 172.19    | 143.31    | 174.68    | 145.46    | 177.20    | 147.67    | 179.84    | 150.02    | 182.56    | 152.46    |
| 0.2499           | 168.35                                  | 139.27    | 170.45    | 141.03    | 172.68    | 142.94    | 175.05    | 145.01    | 177.52    | 147.19    | 179.98    | 149.39    |
| 0.3000           | 166.82                                  | 137.20    | 168.77    | 138.82    | 170.84    | 140.59    | 173.02    | 142.48    | 175.25    | 144.45    | 177.53    | 146.49    |
| 0.3499           | 165.28                                  | 135.19    | 167.09    | 136.67    | 168.99    | 138.27    | 171.01    | 140.00    | 173.08    | 141.81    | 175.15    | 143.63    |
| 0.4000           | 163.79                                  | 133.16    | 165.42    | 134.48    | 167.18    | 135.96    | 169.05    | 137.57    | 170.87    | 139.14    | 172.84    | 140.89    |
| 0.4500           | 162.31                                  | 131.19    | 163.79    | 132.38    | 165.40    | 133.70    | 167.08    | 135.12    | 168.79    | 136.61    | 170.63    | 138.23    |
| 0.5000           | 160.83                                  | 129.24    | 162.19    | 130.31    | 163.69    | 131.54    | 165.21    | 132.82    | 166.83    | 134.21    | 168.51    | 135.68    |
| 0.5500           | 159.44                                  | 127.41    | 160.67    | 128.36    | 162.06    | 129.49    | 163.45    | 130.64    | 164.95    | 131.92    | 166.50    | 133.26    |
| 0.6000           | 158.04                                  | 125.51    | 159.20    | 126.40    | 160.48    | 127.45    | 161.76    | 128.52    | 163.15    | 129.70    | 164.49    | 130.87    |
| 0.6500           | 156.65                                  | 123.68    | 157.73    | 124.50    | 158.89    | 125.43    | 160.07    | 126.39    | 161.34    | 127.47    | 162.70    | 128.65    |
| 0.7001           | 155.35                                  | 121.85    | 156.40    | 122.69    | 157.45    | 123.56    | 158.54    | 124.48    | 159.66    | 125.46    | 160.86    | 126.53    |
| 0.7500           | 154.05                                  | 120.15    | 154.99    | 120.89    | 155.95    | 121.67    | 156.95    | 122.51    | 158.10    | 123.52    | 159.05    | 124.36    |
| 0.8000           | 152.85                                  | 118.51    | 153.72    | 119.20    | 154.56    | 119.89    | 155.47    | 120.66    | 156.53    | 121.59    | 157.51    | 122.47    |
| 0.8500           | 151.61                                  | 116.90    | 152.42    | 117.53    | 153.16    | 118.11    | 154.02    | 118.84    | 154.95    | 119.65    | 155.82    | 120.42    |
| 0.8999           | 150.49                                  | 115.41    | 151.22    | 115.95    | 151.94    | 116.53    | 152.71    | 117.16    | 153.51    | 117.85    | 154.36    | 118.61    |
| 0.9500           | 149.42                                  | 114.02    | 150.05    | 114.46    | 150.66    | 114.91    | 151.39    | 115.50    | 152.16    | 116.16    | 152.91    | 116.81    |
| 1.0000           | 148.33                                  | 112.60    | 148.94    | 113.04    | 149.55    | 113.49    | 150.20    | 114.01    | 150.90    | 114.60    | 151.56    | 115.16    |

$x_{\text{DMF}}$  – molar fraction of *N,N*-dimethyloformamide; The uncertainty of the mole fraction  $x_w$  is equal  $\pm 5 \times 10^{-5}$ .
